# Supplementary material
Source: Springer Nature journal article supplement (https://www.springermedizin.de/resource/supplementary/12889_2010_2779_MOESM1_ESM.pdf/9488930)
Supplement: MOESM1 [file 9488930]

**ASSESSED FOR ELIGIBILITY (n=131)**

**Excluded:** Workers less than 18 years old, on sick leave, on vacation, at night shift, or considered not assessed due to company requirements.

**ENROLLMENT**  
n=120 (51 Clerical + 69 Production)

Written Informed Consent

**ENROLLMENT**  
n=101 (42 Clerical, 56 Production)

Stratified Randomization,  
Baseline WLQ and SF-36

**INTERVENTION  
GROUP  
(n= 50)**

**CONTROL  
GROUP  
(n= 51)**

Not answered baseline questionnaires (n=2)  
Transferred to the night shift (n=1)

Not answered baseline questionnaires (n=1)  
Answered later and was excluded (n=2)

**ALLOCATED TO INTERVENTION (n=47)**

**ALLOCATED TO INTERVENTION (n=48)**

**Lost to follow-up:**  
by dismissed (n=4)  
not answered 5 week questionnaires (n=2)\*

**Lost to follow-up**  
by dismissed (n=1)  
not answered 5 week questionnaires (n=3)\*  
not attended the educational meetings (n=1)

**FOLLOW-UP 5 WEEK (n=41)**

**FOLLOW-UP 5 WEEK (n=43)**

Not answered 26 week questionnaires (n=4)\*

Not answered 26 week questionnaires (n=8)\*

**FOLLOW-UP 26 WEEK (n=39)**

**FOLLOW-UP 26 WEEK (n=38)**

**ANALYZED (n=43)\*\***

**ANALYZED (n=46)\*\***

\* The subjects remained under study.

\*\* Includ subjects that aswered baseline questionnaire and at weeks 5 and/or 26.
